# Supplementary material
Source: PubMed Central journal article supplement (PMC9798629)
Supplement: 12889_2022_14657_MOESM1_ESM.pdf [file 12889_2022_14657_MOESM1_ESM.pdf]

## Supplementary File

**Study Title: Evaluation of a Public COVID-19 Dashboard in the Western Cape, South Africa: a tool for communication, trust, and transparency**

**Supplementary Table 1: Questionnaire with possible response options**

| Question                                                                                 | Variable Type                          | Possible response options                                                                                                                                                                                                                                | Comments                                                                                                                     |
|------------------------------------------------------------------------------------------|----------------------------------------|----------------------------------------------------------------------------------------------------------------------------------------------------------------------------------------------------------------------------------------------------------|------------------------------------------------------------------------------------------------------------------------------|
| What device do you view the dashboard on?                                                | Categorical:<br>Nominal                | <ul style="list-style-type: none"> <li>• Mobile Phone</li> <li>• Desktop Computer/<br/>Laptop</li> <li>• Tablet</li> </ul>                                                                                                                               |                                                                                                                              |
| How often do you check the dashboard?                                                    | Categorical:<br>Ordinal                | <ul style="list-style-type: none"> <li>• Daily</li> <li>• Few times a week</li> <li>• Once a week</li> <li>• Once every 2 weeks</li> <li>• Once a month</li> <li>• Less than once a month</li> </ul>                                                     |                                                                                                                              |
| How easy was the Western Cape COVID-19 dashboard to use?                                 | Likert Scale<br>(Numeric:<br>Discrete) | <ul style="list-style-type: none"> <li>• 1 to 5</li> </ul>                                                                                                                                                                                               |                                                                                                                              |
| How clear and understandable was the information on the Western Cape COVID-19 dashboard? | Likert Scale<br>(Numeric:<br>Discrete) | <ul style="list-style-type: none"> <li>• 1 to 5</li> </ul>                                                                                                                                                                                               |                                                                                                                              |
| Has the dashboard influenced your personal planning or behaviour in the past?            | Binary                                 | <ul style="list-style-type: none"> <li>• Yes</li> <li>• No</li> </ul>                                                                                                                                                                                    | Note: The question is non-mandatory and should the participant prefer not to answer they can move to the following question. |
| What purpose does the dashboard serve for you?                                           | Categorical:<br>Nominal                | <ul style="list-style-type: none"> <li>• Getting an update of Key Indicators</li> <li>• Viewing historical data</li> <li>• Ad hoc analysis</li> <li>• Reporting for the media</li> <li>• Reporting for a particular industry</li> <li>• Other</li> </ul> | Note: Other allows for a free text option as well.                                                                           |
| What is your current occupational status?                                                | Categorical:<br>Nominal                | <ul style="list-style-type: none"> <li>• Employed</li> <li>• Student</li> <li>• Unemployed</li> <li>• Retired</li> </ul>                                                                                                                                 |                                                                                                                              |

|                                                                                                                                               |                                        |                                                                                                                                                                                                                                                                       |                                                                                                                                                                                            |
|-----------------------------------------------------------------------------------------------------------------------------------------------|----------------------------------------|-----------------------------------------------------------------------------------------------------------------------------------------------------------------------------------------------------------------------------------------------------------------------|--------------------------------------------------------------------------------------------------------------------------------------------------------------------------------------------|
| What is your occupation?                                                                                                                      | Categorical:<br>Nominal                | <ul style="list-style-type: none"> <li>Look-up table to OFO (Organizing Framework for Occupations 2019) as reference to all occupations</li> </ul>                                                                                                                    | Note: This only gets asked if the participant states that they are employed in the previous question                                                                                       |
| Which dashboard element do you use the most?                                                                                                  | Categorical:<br>Nominal                | <ul style="list-style-type: none"> <li>Key Indicators</li> <li>Timeline and Case Profile Graphs</li> <li>GIS Map and Graph</li> <li>Subdistrict Trend Page</li> <li>Additional Analyses Graphs</li> <li>Active Cases GIS Map and Graphs</li> </ul>                    | Note: These options will be provided with images representing the various options.                                                                                                         |
| Overall, on a scale from 1 to 10, how would you rate the Western Cape COVID-19 Dashboard?                                                     | Likert Scale<br>(Numeric:<br>Discrete) | <ul style="list-style-type: none"> <li>1 to 10</li> </ul>                                                                                                                                                                                                             |                                                                                                                                                                                            |
| Which gender do you identify as?                                                                                                              | Categorical:<br>Nominal                | <ul style="list-style-type: none"> <li>Male</li> <li>Female</li> <li>Prefer not to say</li> </ul>                                                                                                                                                                     |                                                                                                                                                                                            |
| What age group do you fall in?                                                                                                                | Categorical:<br>Ordinal                | <ul style="list-style-type: none"> <li>0 to 17 years old</li> <li>18 to 29 years old</li> <li>30 to 39 years old</li> <li>40 to 49 years old</li> <li>50 to 59 years old</li> <li>60 to 69 years old</li> <li>70 to 79 years old</li> <li>&gt;80 years old</li> </ul> |                                                                                                                                                                                            |
| Which city do you come from?                                                                                                                  | Categorical:<br>Nominal                | <ul style="list-style-type: none"> <li>All cities in the world</li> </ul>                                                                                                                                                                                             | Note: This field will be include a lookup for all cities in the world                                                                                                                      |
| If you'd like to receive a copy of the results and analysis from this survey, please provide your email address. If not, simply click submit. | Email Address                          | <ul style="list-style-type: none"> <li>Free text with email validation</li> </ul>                                                                                                                                                                                     | Note: This is not for analysis purposes, will be immediately separated from the rest of the dataset and will only be used to communicate findings from the survey back to the participant. |

## Supplementary Analyses

**Supplementary Table 2: Number of views by continental region**

|                           |                                 | COVID-19 dashboard views |             |
|---------------------------|---------------------------------|--------------------------|-------------|
|                           |                                 | Number of views          | Frequency   |
| <b>Continental region</b> | Africa                          | 2,147,897                | 95.53%      |
|                           | Europe                          | 54,853                   | 2.44%       |
|                           | Northern America                | 17,041                   | 0.76%       |
|                           | Asia                            | 5,264                    | 0.23%       |
|                           | Oceania                         | 4,955                    | 0.22%       |
|                           | Latin America and the Caribbean | 519                      | 0.02%       |
|                           | Unknown                         | 17,927                   | 0.80%       |
|                           | <b>Total:</b>                   | <b>2,248,456</b>         | <b>100%</b> |

**Supplementary Table 3: Number of views per day by COVID-19 period (30 April 2020 – 29 April 2021)**

|                                |                     | COVID-19 Wave Period                   |                     |                            |                     |                            |
|--------------------------------|---------------------|----------------------------------------|---------------------|----------------------------|---------------------|----------------------------|
|                                |                     | Initial 2 weeks of launch <sup>3</sup> | Wave 1 <sup>2</sup> | Interwave (1) <sup>2</sup> | Wave 2 <sup>3</sup> | Interwave (2) <sup>2</sup> |
|                                | n                   | 15                                     | 109                 | 45                         | 136                 | 60                         |
| <b>Number of views per day</b> | Median <sup>1</sup> | 13,903                                 | 8,950               | 3,469                      | 4,778.5             | 3,140                      |
|                                | Sum                 | 233,981                                | 957,098             | 155,341                    | 711,493             | 190,543                    |
|                                | Std. Deviation      | 3,816.2                                | 2,788.4             | 630.3                      | 2,089.9             | 627.8                      |
|                                | Minimum             | 11,383                                 | 3,385               | 2,445                      | 2,415               | 2,202                      |
|                                | Maximum             | 23,255                                 | 16,340              | 5,484                      | 10,984              | 4,492                      |

<sup>1</sup>p-values calculated with one-way ANOVA test or Kruskal-Wallis test all showed statistical significance  $p < 0.05$

<sup>2</sup>The Shapiro-Wilk test confirmed a normal distribution with a p-value  $> 0.05$  for Wave 1, Interwave (1), Interwave (2). A one-factor analysis of variance (ANOVA) for these normally distributed periods has shown that there is a significant difference between these categorical variable COVID-19 Wave Periods and the variable Number of views per day  $F = 164.87$ ,  $p = < .001$

<sup>3</sup>The Shapiro-Wilk test confirmed a non-normal distribution by noting a p-value  $< 0.05$  for Initial 2 weeks of launch and Wave 2. A Kruskal-Wallis test for these non-normally distributed periods showed that there is a significant difference between these categorical variable COVID-19 Wave Periods in relation to the variable Number of Views  $p = < .001$ .

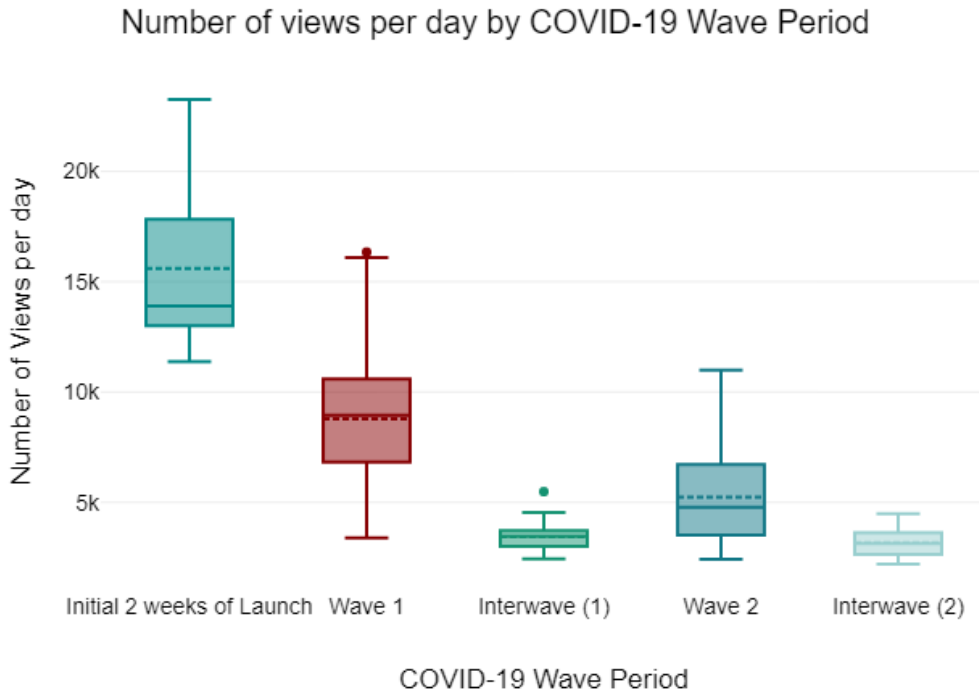

**Supplementary Figure 1: Number of views per day by COVID-19 wave period**

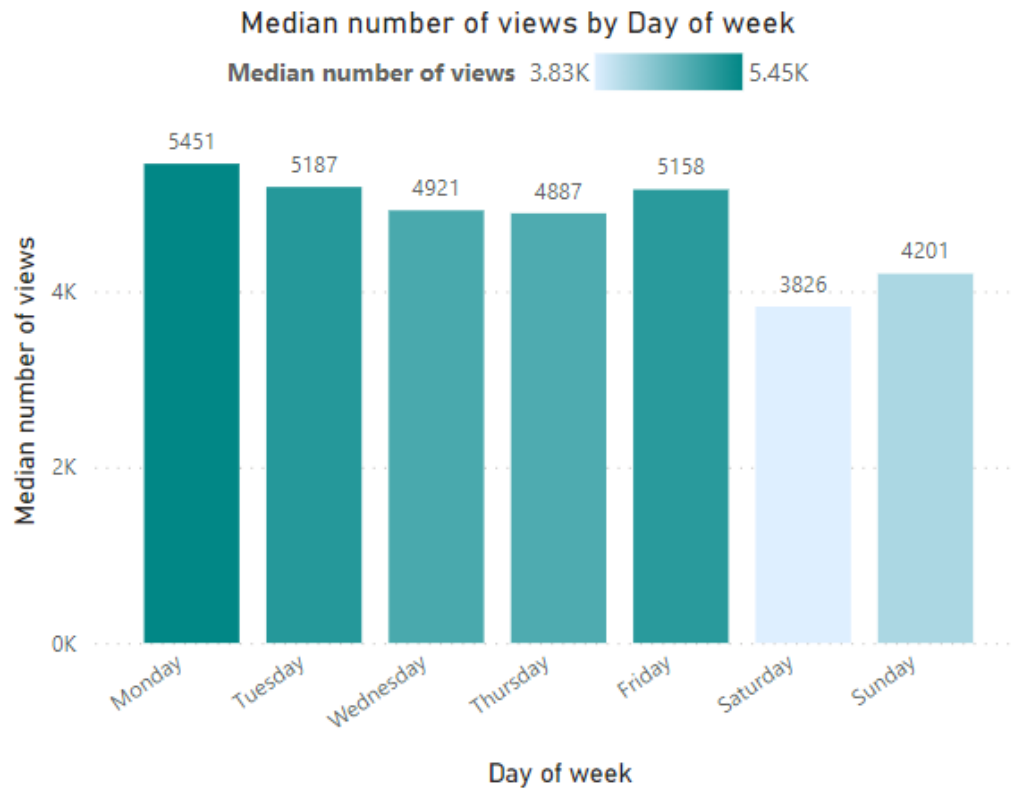

**Supplementary Figure 2: Median number of views by day of week**

Number of views per day by weekday vs weekend

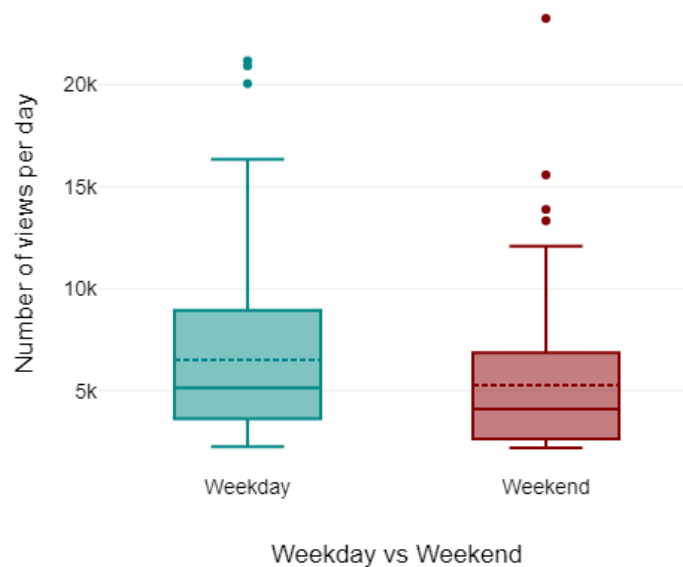

**Supplementary Figure 3: Number of views per day by weekday vs weekend\***

\*The Shapiro-Wilk test confirmed a non-normal distribution by noting a  $p < 0.05$ .  
 p-value calculated with Mann-Whitney U-Test showed statistical significance between the groups  $p < 0.05$

**Supplementary Table 4: Reported devices used by occupational status\* (n=794)**

|                |                                 | Occupational Status |        |         |        |         |       |            |       |       |        |
|----------------|---------------------------------|---------------------|--------|---------|--------|---------|-------|------------|-------|-------|--------|
|                |                                 | Employed            |        | Retired |        | Student |       | Unemployed |       | Total |        |
|                |                                 | n                   | %      | n       | %      | n       | %     | n          | %     | n     | %      |
| Device<br>Used | Desktop<br>Computer<br>/ Laptop | 332                 | 41.81% | 154     | 19.4%  | 12      | 1.51% | 22         | 2.77% | 520   | 65.49% |
|                | Mobile<br>Phone                 | 134                 | 16.88% | 46      | 5.79%  | 16      | 2.02% | 16         | 2.02% | 212   | 26.7%  |
|                | Tablet                          | 34                  | 4.28%  | 25      | 3.15%  | 1       | 0.13% | 2          | 0.25% | 62    | 7.81%  |
| <b>Total</b>   |                                 | 500                 | 62.97% | 225     | 28.34% | 29      | 3.65% | 40         | 5.04% | 794   | 100%   |

\*p-value from Chi<sup>2</sup> test  $< 0.05$

**Supplementary Table 5: Reported frequency of use by age category\* (n=794)**

|                  |                           | Frequency of use |        |                  |        |             |        |                        |       |              |       |                    |       | Total |
|------------------|---------------------------|------------------|--------|------------------|--------|-------------|--------|------------------------|-------|--------------|-------|--------------------|-------|-------|
|                  |                           | Daily            |        | Few times a week |        | Once a week |        | Less than once a month |       | Once a month |       | Once every 2 weeks |       |       |
|                  |                           | n                | %      | n                | %      | n           | %      | n                      | %     | n            | %     | n                  | %     |       |
| <b>Age Group</b> | <b>0 to 29 years old</b>  | 13               | 29.55% | 15               | 34.09% | 7           | 15.91% | 2                      | 4.55% | 3            | 6.82% | 4                  | 9.09% | 44    |
|                  | <b>30 to 49 years old</b> | 136              | 43.87% | 90               | 29.03% | 34          | 10.97% | 10                     | 3.23% | 17           | 5.48% | 23                 | 7.42% | 310   |
|                  | <b>50 to 69 years old</b> | 206              | 61.68% | 68               | 20.36% | 33          | 9.88%  | 7                      | 2.1%  | 8            | 2.4%  | 12                 | 3.59% | 334   |
|                  | <b>&gt;70 years old</b>   | 69               | 65.09% | 19               | 17.92% | 13          | 12.26% | 2                      | 1.89% | 0            | 0%    | 3                  | 2.83% | 106   |
|                  | <b>Total</b>              | 424              |        | 192              |        | 87          |        | 21                     |       | 28           |       | 42                 |       | 794   |

\*p-value from Chi<sup>2</sup> test <0.05

**Supplementary Table 6: Reported impact on personal planning and behaviour by element most often used\* (n=794)**

|                                          |                                         | Dashboard has influenced participant's personal planning or behaviour |        |     |        |       |        |
|------------------------------------------|-----------------------------------------|-----------------------------------------------------------------------|--------|-----|--------|-------|--------|
|                                          |                                         | YES                                                                   |        | NO  |        | Total |        |
|                                          |                                         | n                                                                     | %      | n   | %      | n     | %      |
|                                          | <b>Key Indicators</b>                   | 242                                                                   | 78.32% | 67  | 21.68% | 309   | 38.92% |
| <b>Dashboard element most often used</b> | <b>GIS Map and Graph</b>                | 59                                                                    | 67.05% | 29  | 32.95% | 88    | 11.08% |
|                                          | <b>Additional Analyses Graphs</b>       | 60                                                                    | 89.55% | 7   | 10.45% | 67    | 8.44%  |
|                                          | <b>Subdistrict Trend Page</b>           | 84                                                                    | 77.78% | 24  | 22.22% | 108   | 13.60% |
|                                          | <b>Active Cases GIS Map and Graphs</b>  | 76                                                                    | 79.17% | 20  | 20.83% | 96    | 12.09% |
|                                          | <b>Timeline and Case Profile Graphs</b> | 86                                                                    | 68.25% | 40  | 31.75% | 126   | 15.87% |
|                                          | <b>Total</b>                            | 607                                                                   | 76.44% | 187 | 23.56% | 794   | 100%   |

\*p-value from Chi<sup>2</sup> test <0.05

**Supplementary Table 7: Reported purpose of dashboard for participants\* (n=1279)**

| What purpose does the dashboard serve for you? | Number of responses |             |
|------------------------------------------------|---------------------|-------------|
|                                                | Frequency (n)       | %           |
| Getting an update of Key Indicators            | 739                 | 57.78%      |
| Viewing historical data                        | 277                 | 21.66%      |
| Ad hoc analysis                                | 213                 | 16.65%      |
| Reporting for a particular industry            | 36                  | 2.81%       |
| Reporting for the media                        | 14                  | 1.09%       |
| <b>Total</b>                                   | <b>1279</b>         | <b>100%</b> |

\*Multiple responses were allowed for this question. Free text feedback marked as 'other' was removed for this analysis.
